# Supplementary material for: Variation in cooking and eating quality traits in Japanese rice germplasm accessions
Source: PubMed Central journal article supplement — Breed Sci. 2016 Mar 1;66(2):309–18. doi: 10.1270/jsbbs.66.309 (PMC4785008; doi:10.1270/jsbbs.66.309), 2016-03-01
Supplement: 66_309_1.pdf [file 66_309_1.pdf]

### Low-high compression test

Taketomo Electric Incorporated,  
Tensipresser My boy System

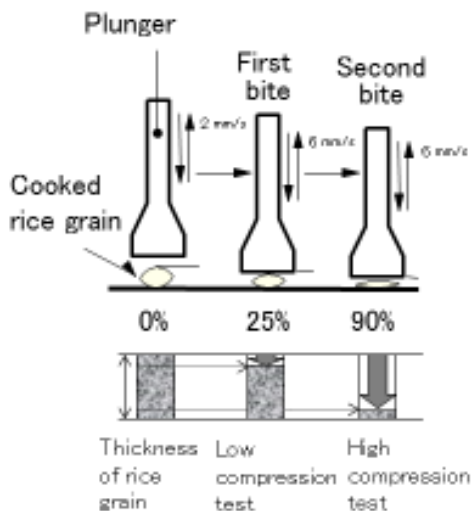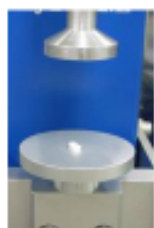

#### Low compression test

#### High compression test

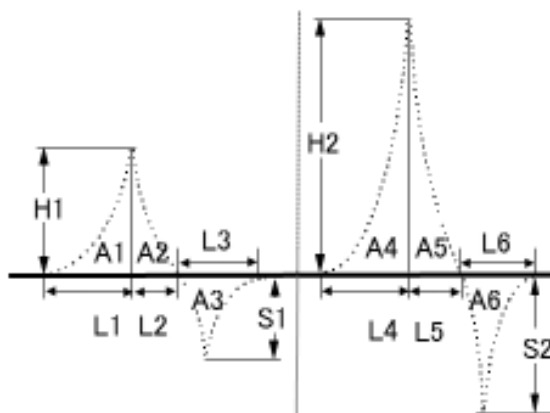

Physical properties of surface of rice grain.

Physical properties of overall of rice grain

- Hardness: H1
- Stickiness: S1
- Adhered mass: L3
- Adhesiveness: A3
- Balance degree: S1/H1
- Balance degree: A3/A1
- Balance degree: L3/L1

- Hardness: H2
- Stickiness: S2
- Adhered mass: L6
- Adhesiveness: A6
- Balance degree: S2/H2
- Balance degree: A6/A4
- Balance degree: L6/L4

### Multiple compression test

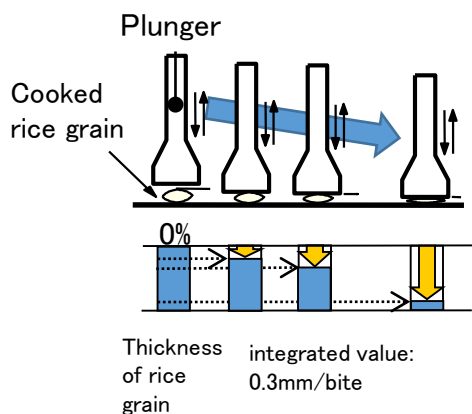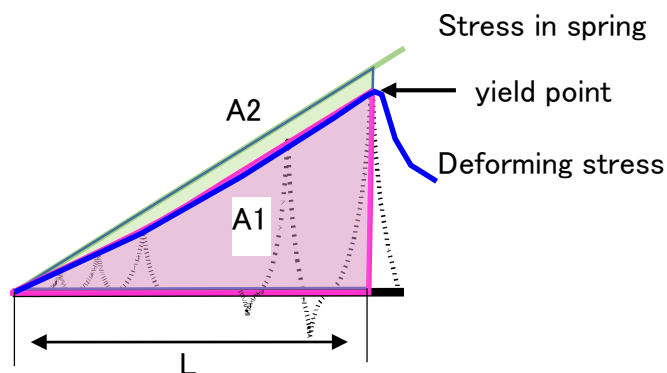

- Toughness: curved surface  $\Delta A1$
- Tenderness: stress at yield point
- Brittleness: sample thickness/length L
- Pliability:  $\Delta A2 /$  curved surface  $\Delta A1$

**Supplemental Fig. 1.** Model of the high-compression/low-compression method for cooked rice grains using the Tensipresser MyBoy system. Compressing the rice grains by 25% of their initial thickness evaluates the textural properties of the surface layer of the cooked grains, whereas compressing the grains by 90% of their initial thickness evaluates the textural properties of the whole grain.

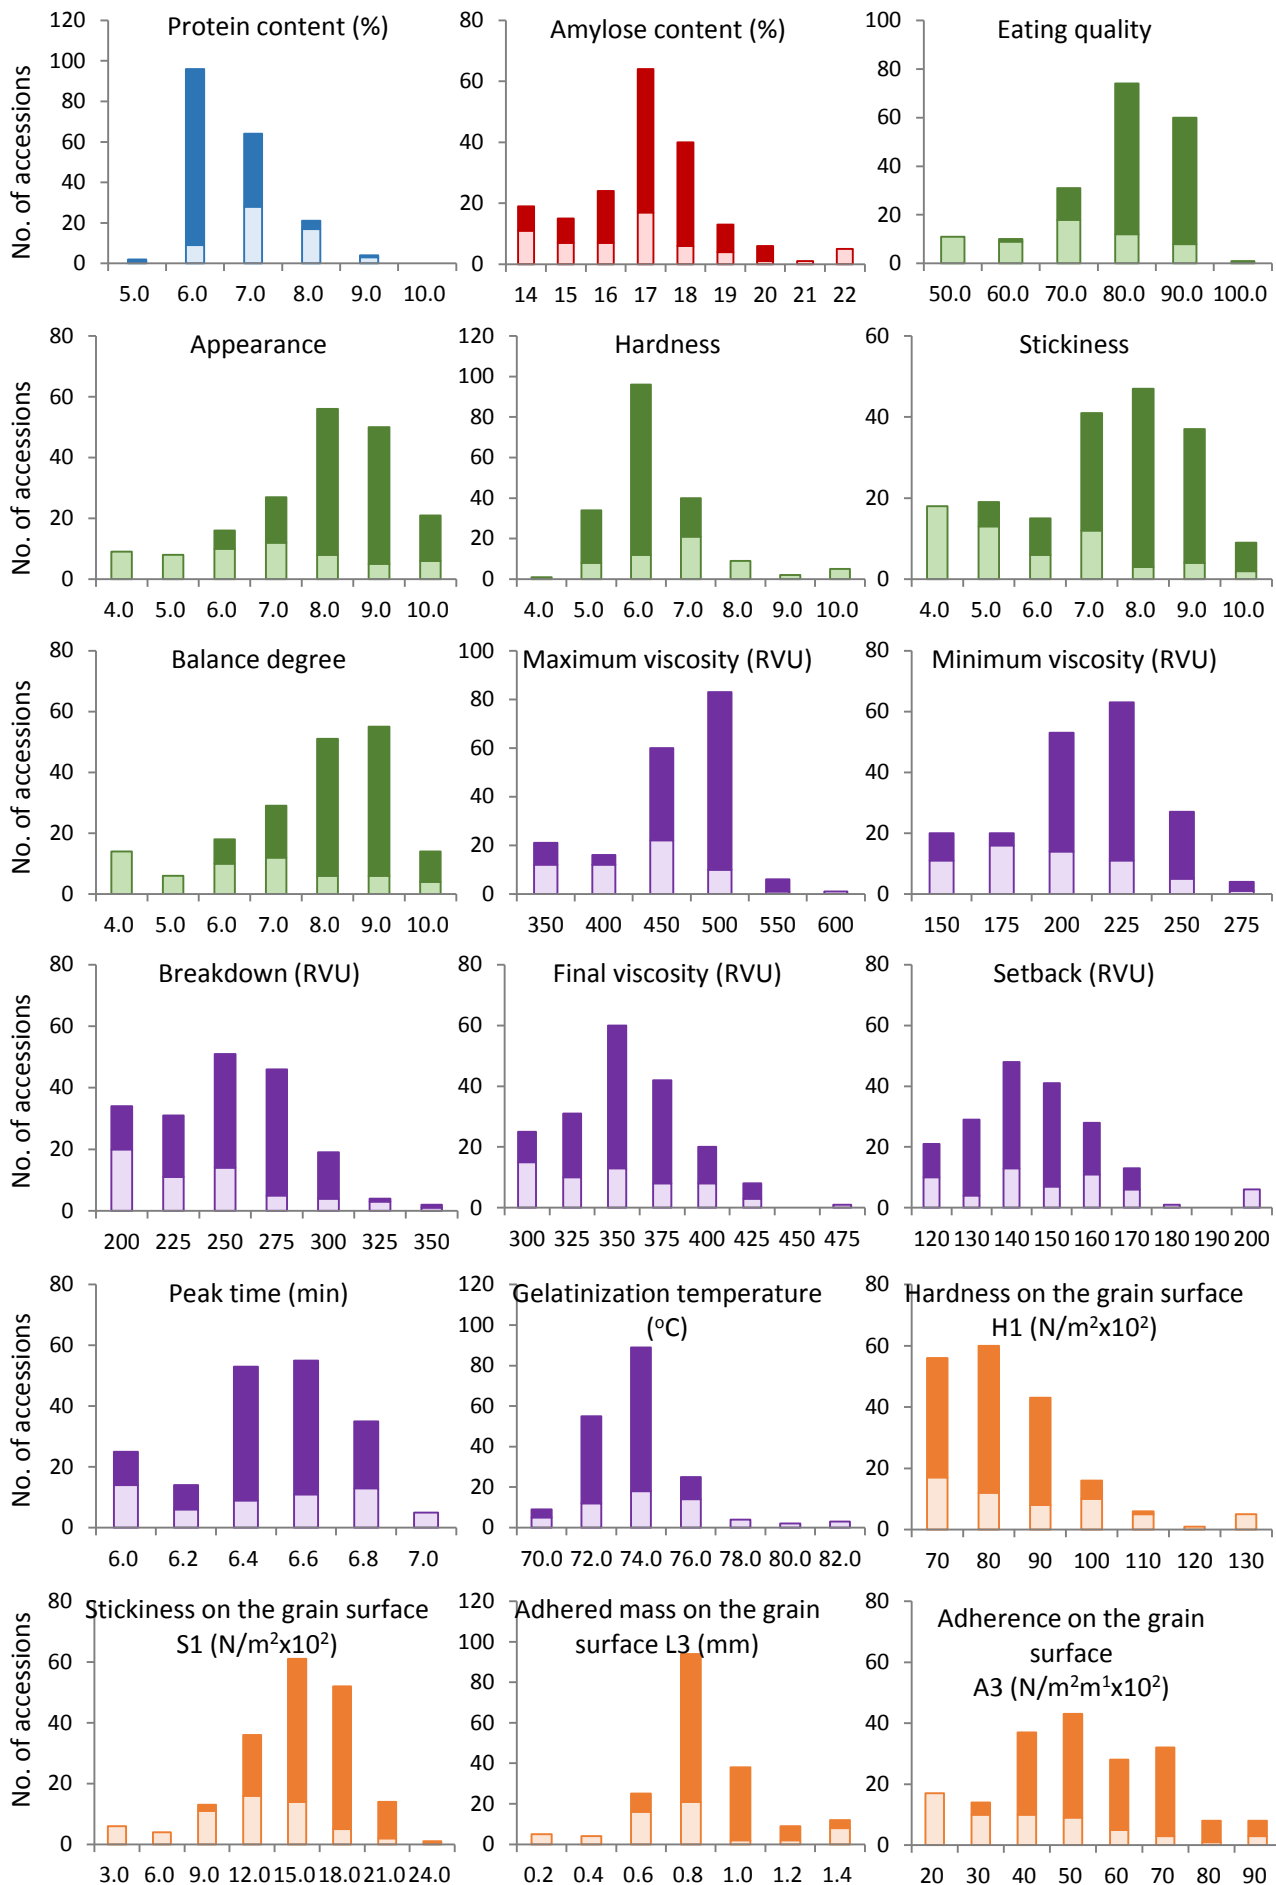

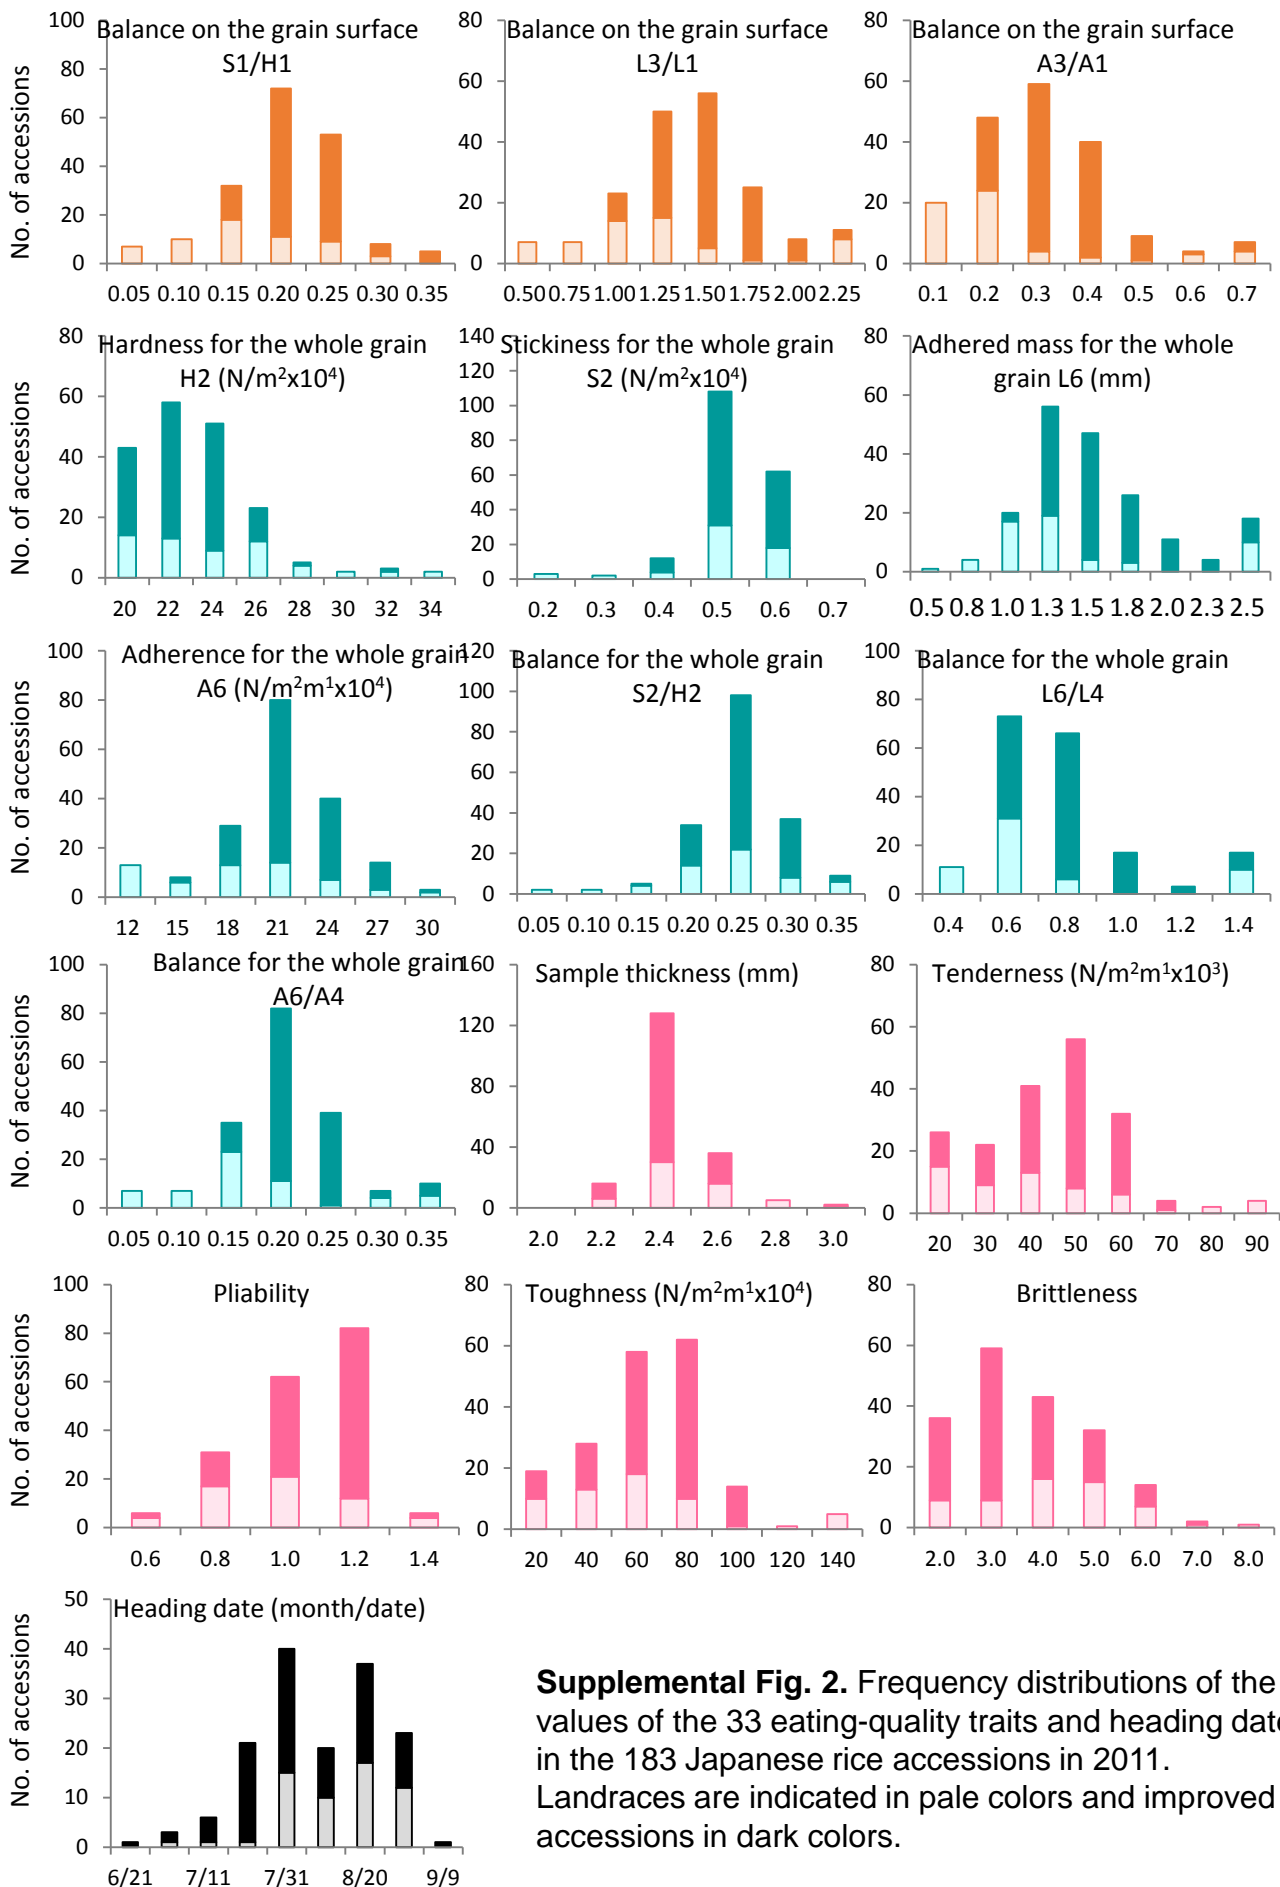

**Supplemental Fig. 2.** Frequency distributions of the values of the 33 eating-quality traits and heading date in the 183 Japanese rice accessions in 2011. Landraces are indicated in pale colors and improved accessions in dark colors.
